# Supplementary material
Source: publisher site journal article supplement (https://www.dovepress.com/get_supplementary_file.php?f=347898.docx)

**Supplemental materials**

**Daily Hair Shedding Evaluation for Alopecia: a Refined Wash Test**

Xiangqian Li, M.D.1, Xianghe Wang, M.D.1, Chen Wang, M.D. 1, Jianzhong Zhang, M.D.1, Cheng Zhou, M.D.1#

1. Department of Dermatology, Peking University People’s Hospital, Beijing, China.

**Supplemental Table 1.** Comparisons of shedding hair number, hair diameter, percentage of vellus hairs and terminal hairs in the refined wash test for 3-consecutive-days and 7-consecutive-days (to established the method and test the reliability) among the study groups.

| Classification | | Shedding hair number | Hair diameter (μm) | Vellus hairs (%) | Terminal hairs (%) |
| --- | --- | --- | --- | --- | --- |
| Normal | Three-day wash test† | 24.9 ± 9.5 | 75.3 ± 8.2 | 1.0 ± 1.8 | 77.1 ± 13.0 |
| Seven-day wash test† | 24.4 ± 8.6 | 74.8 ± 7.5 | 0.8 ± 1.1 | 76.6 ± 12.6 |
| p-Value‡ | 0.217 | 0.160 | 0.135 | 0.502 |
| AGA | Three-day wash test† | 45.6 ± 21.2 | 61.4 ± 9.4 | 8.0 ± 6.5 | 52.3 ± 19.4 |
| Seven-day wash test† | 44.9 ± 20.3 | 61.2 ± 9.0 | 7.8 ± 5.7 | 51.6 ± 19.1 |
| p-Value‡ | 0.233 | 0.367 | 0.528 | 0.258 |
| TE | Three-day wash test† | 123.4 ± 36.0 | 87.1 ± 12.4 | 1.0 ± 1.0 | 89.3 ± 7.7 |
| Seven-day wash test† | 121.4 ± 32.5 | 86.2 ± 12.4 | 0.7 ± 0.7 | 88.5 ± 10.4 |
| p-Value‡ | 0.393 | 0.060 | 0.152 | 0.504 |

**Notes:** † Values are number (mean ± SD).

‡ From paired-samples t-test, assuming independent observations and equal variances.

**Supplemental Figure 1.** The procedure of measurement of shed hair diameter.


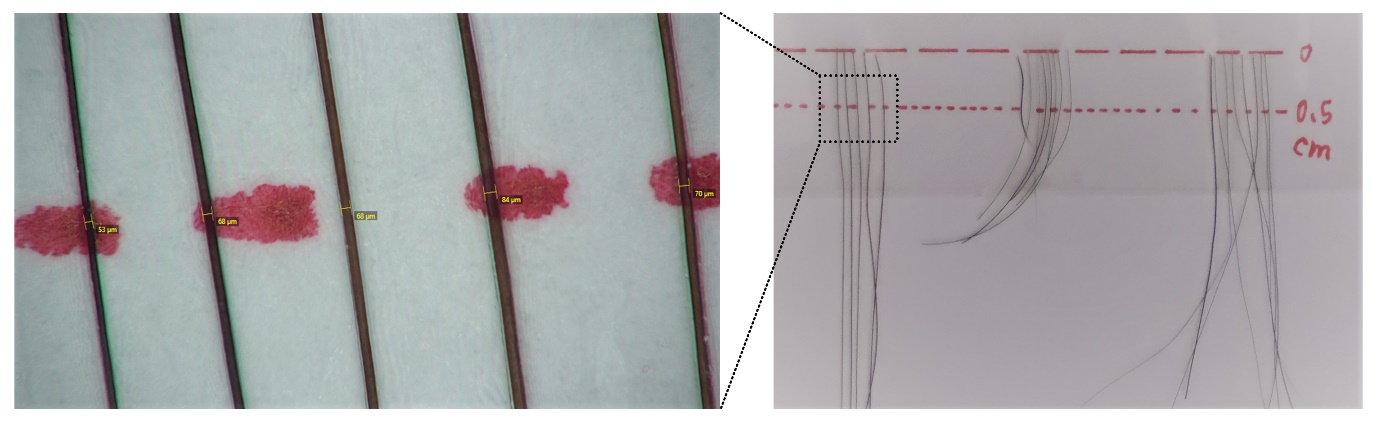

Supplement: Supplementary file 1 [file get_supplementary_file.php]
